# Supplementary material for: Acute kidney injury as a key predictor of cardiovascular events in chronic kidney disease patients: the CKD-REIN study
Source: PubMed Central journal article supplement (PMC11646099; doi:10.1093/ckj/sfae337), 2024-12-11
Supplement: sfae337_supplemental_file.pdf [file sfae337_supplemental_file.pdf]

## Supplementary material

### **Acute Kidney Injury as a Key Predictor of Cardiovascular Events in Chronic Kidney Disease Patients: the CKD-REIN study**

*Nans Florens, Estelle Aymes, Victoria Gauthier, Luc Frimat, Maurice Laville, Dimitri Bedo, Thomas Beaudrey, Philippe Amouyel, Nicolas Mansencal, Céline Lange, Sophie Liabeuf, Ziad A. Massy, Benedicte Stengel, Natalia Alencar de Pinho, Aghiles Hamroun*

**Table S1:** Sensitivity analysis: Adjusted Hazard Ratios of subsequent MACE associated with incident AKI event, after censoring of concomitant AKI-MACE events

**Table S2:** Sensitivity analysis: Adjusted Hazard Ratios of subsequent MACE associated with incident AKI event, after exclusion of patients with a history of AKI or cardiovascular event at baseline

**Table S1.** Sensitivity analysis: Adjusted Hazard Ratios (95% Confidence Interval) of subsequent MACE associated with incident AKI event, after censoring of concomitant AKI-MACE events (N = 3,033, number of AKI events = 444).

| <b>Outcome</b>                           | <b>Adjusted Hazard ratio (95% confidence interval)</b> | <b><i>p</i>-value</b> |
|------------------------------------------|--------------------------------------------------------|-----------------------|
| <b>All MACE confounded</b>               | 2.69 (2.04 – 3.55)                                     | < 0.001               |
| <b>Myocardial infarction</b>             | 5.50 (2.93 – 10.30)                                    | < 0.001               |
| <b>Hospitalization for heart failure</b> | 1.97 (1.38 – 2.79)                                     | < 0.001               |
| <b>Stroke</b>                            | 3.49 (1.75 – 6.96)                                     | <0.001                |
| <b>Cardiovascular death</b>              | 3.58 (1.94 – 6.63)                                     | < 0.001               |

**Table S2.** Sensitivity analysis: Adjusted Hazard Ratios (95% Confidence Interval) of subsequent MACE associated with incident AKI event, after exclusion of patients with a history of AKI or cardiovascular event at baseline (N = 1,820, number of AKI events = 245, number of MACE = 188).

| <b>Outcome</b>                           | <b>Adjusted Hazard ratio (95% confidence interval)</b> | <b><i>p-value</i></b> |
|------------------------------------------|--------------------------------------------------------|-----------------------|
| <b>All MACE confounded</b>               | 6.69 (4.28 – 10.46)                                    | < 0.001               |
| <b>Myocardial infarction</b>             | 6.43 (2.47 – 16.73)                                    | < 0.001               |
| <b>Hospitalization for heart failure</b> | 9.59 (5.24 – 17.55)                                    | < 0.001               |
| <b>Stroke</b>                            | 4.90 (1.71-14.04)                                      | <0.001                |
| <b>Cardiovascular death</b>              | 6.22 (2.34 – 16.54)                                    | < 0.001               |
